# Supplementary material for: Phototransformation of anthraquinone-2-sulphonate in aqueous solution
Source: Royal Society of Chemistry journal article supplement (doi:10.1039/c2pp25111f), 2012-06-13
Supplement: c2pp25111f.pdf [file c2pp25111f.pdf]

## ELECTRONIC SUPPLEMENTARY INFORMATION

### Phototransformation of anthraquinone-2-sulphonate in aqueous solution

**Andrea Bedini,<sup>a</sup> Babita Sur,<sup>a,b</sup> Elisa De Laurentiis,<sup>a</sup> Valter Maurino,<sup>a</sup> Claudio Minero,<sup>a</sup>  
Marcello Brigante,<sup>\*c,d</sup> Gilles Mailhot<sup>c,d</sup> and Davide Vione<sup>\*a,e</sup>**

<sup>a</sup> *Dipartimento di Chimica, Università di Torino, Via P. Giuria 5, 10125 Torino, Italy.*  
<http://www.chimicadellambiente.unito.it>

<sup>b</sup> *Department of Chemical Engineering, Calcutta University, 92 Acharya P. C. Road, Kolkata 700009, India.*

<sup>c</sup> *Clermont Université, Université Blaise Pascal, Institut de Chimie de Clermont-Ferrand, BP 10448, F-63000, Clermont-Ferrand, France.*

<sup>d</sup> *CNRS, UMR 6296, ICCF, BP 80026, Aubière, France.*

<sup>e</sup> *Centro Interdipartimentale NatRisk, Università di Torino, Via Leonardo da Vinci 44, 10095 Grugliasco (TO), Italy.* <http://www.natrisk.org>

\* Address correspondence to either author.

[marcello.brigante@univ-bpclermont.fr](mailto:marcello.brigante@univ-bpclermont.fr)

[davide.vione@unito.it](mailto:davide.vione@unito.it)

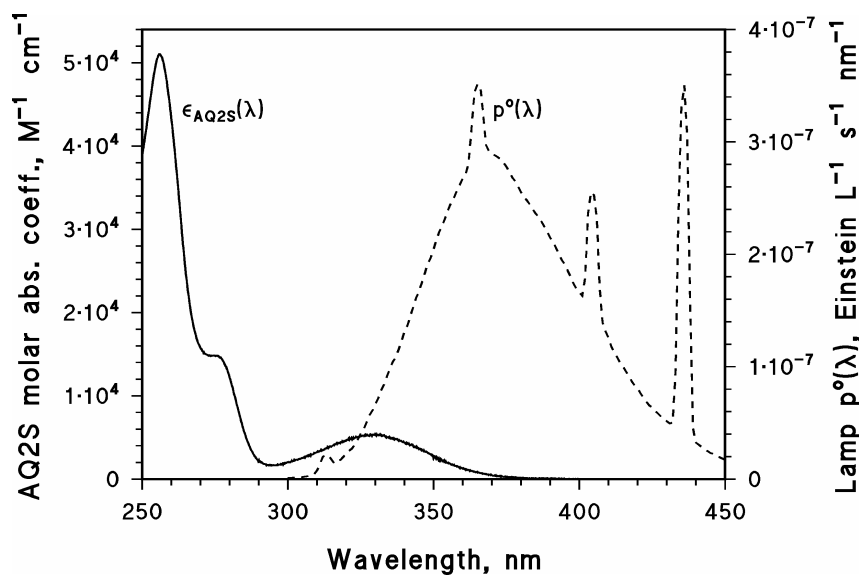

**Figure ESI-1.** Absorption spectrum of AQ2S (molar absorption coefficient  $\epsilon_{\text{AQ2S}}(\lambda)$ ). Emission spectrum of the UVA lamp (spectral photon flux density  $p^\circ(\lambda)$ ).<sup>1</sup>

<sup>1</sup> P. R. Maddigapu, A. Bedini, C. Minero, V. Maurino, D. Vione, M. Brigante, G. Mailhot and M. Sarakha, The pH-dependent photochemistry of anthraquinone-2-sulfonate, *Photochem. Photobiol. Sci.* 2010, **9**, 323-330.

## Optimised structure features

The figure below shows the gas-phase optimised structure of anthraquinone-2-sulphonate (AQ2S) in its ground state ( $S_0$ ). The bond lengths of both  $S_0$  and  $T_1$  states are also reported.

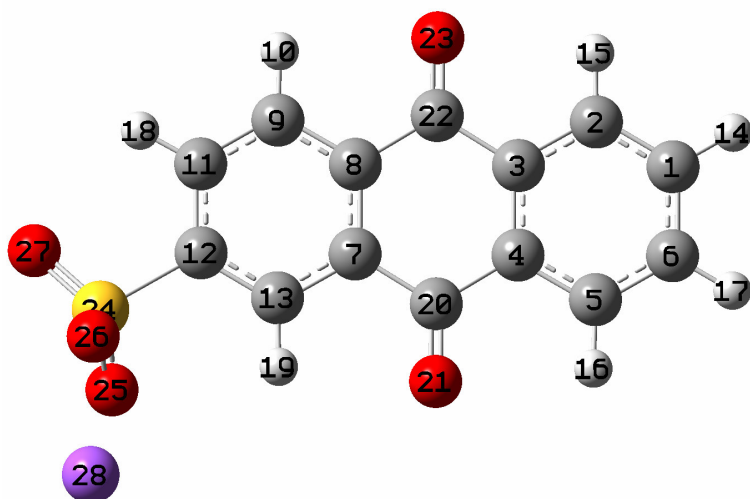

Figure ESI-2

## Bond lengths for the optimised geometry of AQ2S in $S_0$ and $T_1$ states

| Bond length (Å) | AQ2S ( $S_0$ ) | AQ2S ( $T_1$ ) |
|-----------------|----------------|----------------|
| C22 – O23       | 1.2187         | 1.3023         |
| C20 – O21       | 1.2200         | 1.2311         |
| C1 – C2         | 1.3892         | 1.3795         |
| C2 – C3         | 1.3976         | 1.4152         |
| C3 – C4         | 1.4060         | 1.4161         |
| C4 – C5         | 1.3978         | 1.4023         |
| C5 – C6         | 1.3891         | 1.3836         |
| C6 – C1         | 1.3974         | 1.4057         |
| C7 – C8         | 1.4064         | 1.4162         |
| C8 – C9         | 1.3968         | 1.4166         |
| C9 – C11        | 1.3899         | 1.3766         |
| C11 – C12       | 1.3953         | 1.4061         |
| C12 – C13       | 1.3881         | 1.3819         |
| C13 – C7        | 1.3945         | 1.4002         |
| C7 – C20        | 1.4919         | 1.4767         |
| C20 – C4        | 1.4914         | 1.4769         |
| C3 – C22        | 1.4931         | 1.4416         |
| C22 – C8        | 1.4924         | 1.4384         |
| C1 – H14        | 1.0840         | 1.0841         |
| C2 – H15        | 1.0829         | 1.0836         |
| C5 – H16        | 1.0828         | 1.0834         |
| C6 – H17        | 1.0840         | 1.0836         |
| C9 – H10        | 1.0828         | 1.0836         |
| C11 – H 18      | 1.0826         | 1.0826         |
| C13 – H 19      | 1.0817         | 1.0822         |

|            |        |        |
|------------|--------|--------|
| S24 – C12  | 1.8090 | 1.8040 |
| S24 – O25  | 1.5073 | 1.5076 |
| S24 – O26  | 1.5085 | 1.5103 |
| S24 – O27  | 1.4062 | 1.4609 |
| O26 – Na28 | 2.2223 | 2.2167 |
| O27 – Na28 | 2.2259 | 2.2235 |

The obtained structure has been compared to the XRD data collected by Gamage.<sup>2</sup> Bond lengths of the AQ2S skeleton calculated by us are comparable with the XRD ones: calculated and experimental data have an average absolute deviation of  $1.9 \cdot 10^{-3}$  Å. Sulphur-oxygen distances are slightly overestimated by our calculation ( $1.6 \cdot 10^{-2}$  Å as average absolute deviation), but the molecular structure optimised through the computation can be considered as a sufficiently good model for the real one.

### Analysis of triplet state: geometry and spin densities

Also for AQ2S in its lower-lying triplet state ( $T_1$ ) a geometry optimisation has been performed (see data reported above). A comparison with the bond lengths of the  $S_0$  ground state shows that the length of C=O bond increases, confirming the incipient nature of the  $>C-O^\bullet$  bond in the excited state. In particular the carbonyl group made of C22 – O23 atoms shows a more marked increase (0.08 Å) of bond length compared to the other carbonyl group (C20 – O21 atoms), which displays only a weak lengthening (0.01 Å). The S24 – O27 bond length (sulphonate group) shows an increase of 0.05 Å. To counterbalance these effects, a shrinking of the central six member carbon ring of the molecule is observed, where the C-C bonds in *alpha* to the carbonyl group tend to gain a more marked  $sp^2$  character.

The total spin density surface of AQ2S  $T_1$  is reported in Figure 2 of the manuscript and below.

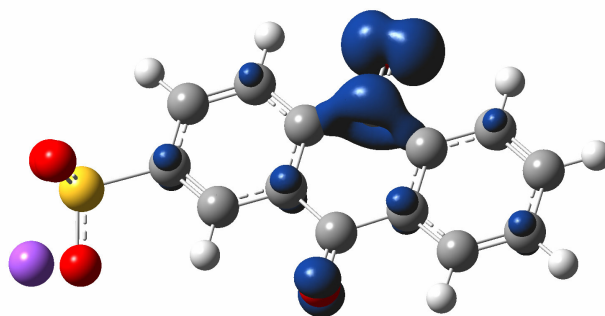

As can be seen, there are two main areas where the spin density is higher. The strongest one is centred on the carbonyl group (C22 – O23 atoms), the other one is on the atoms that allow the resonance of unpaired electrons on the aromatic skeleton of the molecule. In particular it can be

<sup>2</sup> R.S.K.A. Gamage, B.M. Peake, J. Simpson, *Aust. J. Chem.* **1993**, *46*, 1595-1604

observed that the spin density localised on O21 is itself the result of the resonance on the skeleton of AQ2S, due to the favourable position of the oxygen *p* orbital that is parallel to the aromatic  $\pi$  system.

The spin density of the carbonyl C22-O23 is curiously similar to that found on carbon monoxide in its lower-lying triplet state. Spin density is localised on the unoccupied  $\pi^*$  system of the carbonyl group, and its more roundish distribution around the C23 atom can be explained in terms of contribution of a carbon *p* orbital, due to the spin resonance over the aromatic skeleton of the molecule. Sulphur atoms and the associated oxygen atoms of the sulphonate groups, as well as hydrogen atoms, exhibit negligible spin density. Taking into account these considerations and previous results concerning the photoreactivity of anthraquinones,<sup>3</sup> we suppose that the two carbonyl groups of AQ2S are not equivalent from a reactivity point of view. We expect that the spin density on the carbonylic oxygen O23 accounts for AQ2S photochemistry, while the spin density delocalised over the aromatic skeleton is quite unreactive.

### Mulliken atomic spin densities of AQ2S in its T<sub>1</sub> state

|       |           |
|-------|-----------|
| 1 C   | -0.060528 |
| 2 C   | 0.127620  |
| 3 C   | -0.011450 |
| 4 C   | 0.135184  |
| 5 C   | -0.049643 |
| 6 C   | 0.123136  |
| 7 C   | 0.137618  |
| 8 C   | -0.009051 |
| 9 C   | 0.128062  |
| 10 H  | -0.006550 |
| 11 C  | -0.056117 |
| 12 C  | 0.119624  |
| 13 C  | -0.054817 |
| 14 H  | 0.003167  |
| 15 H  | -0.006581 |
| 16 H  | 0.002694  |
| 17 H  | -0.007093 |
| 18 H  | 0.002924  |
| 19 H  | 0.002779  |
| 20 C  | -0.013281 |
| 21 O  | 0.193363  |
| 22 C  | 0.319862  |
| 23 O  | 0.972766  |
| 24 S  | -0.005435 |
| 25 O  | 0.002204  |
| 26 O  | 0.006684  |
| 27 O  | 0.002812  |
| 28 Na | 0.000047  |

Sum of Mulliken spin densities= 2.00000

<sup>3</sup> V. Maurino, A. Bedini, D. Borghesi, D. Vione, C. Minero, *Phys. Chem. Chem. Phys.* **2011**, *13*, 11213-11221

## Excited states and electronic absorption spectrum

The TDDFT calculation was performed on AQ2S gas-phase optimised geometry to calculate the first 30 singlet and 30 triplet excited states. The purpose is to understand the behaviour of excited AQ2S by exploring the nature and position of its energy levels. TDDFT calculation was executed on the liquid phase, and the solvent effect was taken into account with the PCM method.

All the transitions from  $S_0$  to a triplet state are forbidden by multiplicity rules and the related oscillator strength is zero. The lowest-lying triplet is positioned 2.6611 eV above the ground state of the molecule. The calculated absorption properties for AQ2S in the liquid phase are reported in Table ESI-1, where only transitions with an oscillator strength higher than 0.1 are described and compared with the experimental results. The obtained values are in very good agreement with experimental data as can be seen from the Table itself and from Figure 3 in the manuscript, which shows a fine match among experimental and simulated UV-VIS spectra of AQ2S in aqueous solution (both wavelengths and extinction coefficients).

**Table ESI-1.** Calculated absorption properties of AQ2S in water, where Transition<sup>a</sup> = as named from the calculation, E<sup>b</sup> = excitation energy,  $\lambda^c$  = corresponding wavelength,  $f^d$  = oscillator strength (dimensionless quantity),  $\epsilon^e$  = calculated molar absorption coefficient ( $10^4 \text{ M}^{-1} \text{ cm}^{-1}$ );  $\lambda_{\text{exp}}^f$  = band maximum wavelength from experimental UV-VIS spectra and  $\epsilon^g$  = experimental molar absorption coefficient ( $10^4 \text{ M}^{-1} \text{ cm}^{-1}$ ). Experimental results are from this work (UV-VIS spectra).

| Transition <sup>a</sup> | E <sup>b</sup> (eV) | $\lambda^c$ (nm) | $f^d$  | $\epsilon^e$ | Contributions                                                                                                            | $\lambda_{\text{exp}}^f$ (nm) | $\epsilon^g$ |
|-------------------------|---------------------|------------------|--------|--------------|--------------------------------------------------------------------------------------------------------------------------|-------------------------------|--------------|
| S4                      | 3.7192              | 333              | 0.1119 | 1.2417       | H-2→LUMO (67%)<br>HOMO→LUMO (5%)<br>HOMO→L+1 (2%)                                                                        | 330                           | 0.5782       |
| S7                      | 4.3378              | 286              | 0.1779 | 1.3118       | H-6→LUMO (78%)<br>H-4→LUMO (6%)                                                                                          | 274                           | 1.5803       |
| S10                     | 4.8585              | 255              | 0.5697 | 5.0491       | HOMO→L+1 (65%)                                                                                                           | 256                           | 5.0840       |
| S19                     | 5.7358              | 216              | 0.1376 | 1.0111       | H-2→L+2 (40%),<br>HOMO→L+2 (12%),<br>H-6→L+3 (3%),<br>H-4→L+3 (3%),<br>H-2→L+3 (8%)                                      | 206                           | 3.4207       |
| S22                     | 5.8491              | 212              | 0.1851 | 3.6674       | H-5→L+2 (10%),<br>H-4→L+2 (23%),<br>H-3→L+2 (13%),<br>HOMO→L+2 (16%),<br>H-6→L+1 (4%),<br>H-6→L+3 (3%),<br>HOMO→L+3 (3%) | 206                           | 3.4207       |
| S28                     | 6.0182              | 206              | 0.1020 | 3.1345       | HOMO→L+2 (35%),<br>H-2→L+3 (9%)                                                                                          | 206                           | 3.4207       |

## Calculated absorption properties of AQ2S (S<sub>0</sub>), at the liquid-phase PCM level

### First 30 excited singlet states

| No.                                                                                                                | Energy (eV) | Wavelength (nm) | Osc. Strength | Symmetry  |
|--------------------------------------------------------------------------------------------------------------------|-------------|-----------------|---------------|-----------|
| 1                                                                                                                  | 3.0739      | 403.35          | 0.0           | Singlet-A |
| Major and minor contributions (%)                                                                                  |             |                 |               |           |
| H-1->LUMO (89%), H-5->L+1 (2%), H-2->LUMO (-2%)                                                                    |             |                 |               |           |
| 2                                                                                                                  | 3.3736      | 367.51          | 0.0           | Singlet-A |
| H-5->LUMO (88%), H-1->L+1 (5%)                                                                                     |             |                 |               |           |
| 3                                                                                                                  | 3.5648      | 347.8           | 0.012         | Singlet-A |
| H-2->LUMO (-10%), HOMO->LUMO (78%), H-4->LUMO (-2%)                                                                |             |                 |               |           |
| 4                                                                                                                  | 3.7192      | 333.36          | 0.1119        | Singlet-A |
| H-4->LUMO (-15%), H-2->LUMO (67%), HOMO->LUMO (5%), HOMO->L+1 (2%)                                                 |             |                 |               |           |
| 5                                                                                                                  | 3.8366      | 323.16          | 0.0537        | Singlet-A |
| H-4->LUMO (40%), H-3->LUMO (30%), H-6->LUMO (-4%), H-6->L+1 (-2%), H-2->LUMO (8%), HOMO->LUMO (9%)                 |             |                 |               |           |
| 6                                                                                                                  | 3.8651      | 320.78          | 0.0159        | Singlet-A |
| H-4->LUMO (-26%), H-3->LUMO (67%), H-2->LUMO (-2%)                                                                 |             |                 |               |           |
| 7                                                                                                                  | 4.3378      | 285.82          | 0.1779        | Singlet-A |
| H-6->LUMO (78%), H-4->LUMO (6%)                                                                                    |             |                 |               |           |
| 8                                                                                                                  | 4.5366      | 273.3           | 0.0           | Singlet-A |
| H-1->L+1 (89%), H-5->LUMO (-7%), H-2->L+1 (-2%)                                                                    |             |                 |               |           |
| 9                                                                                                                  | 4.7488      | 261.08          | 0.001         | Singlet-A |
| H-7->LUMO (81%), H-8->LUMO (5%), H-5->L+1 (9%)                                                                     |             |                 |               |           |
| 10                                                                                                                 | 4.8584      | 255.19          | 0.5697        | Singlet-A |
| HOMO->L+1 (65%), H-8->LUMO (-9%), H-2->L+1 (-3%), H-2->L+2 (-3%)                                                   |             |                 |               |           |
| 11                                                                                                                 | 4.8748      | 254.34          | 0.0276        | Singlet-A |
| H-7->LUMO (-12%), H-5->L+1 (79%), H-1->LUMO (-2%), HOMO->L+1 (3%)                                                  |             |                 |               |           |
| 12                                                                                                                 | 4.9279      | 251.6           | 0.0574        | Singlet-A |
| H-8->LUMO (-10%), H-3->L+1 (23%), H-2->L+1 (56%), HOMO->L+2 (2%)                                                   |             |                 |               |           |
| 13                                                                                                                 | 4.935       | 251.23          | 0.0006        | Singlet-A |
| H-8->LUMO (15%), H-3->L+1 (69%), H-2->L+1 (-11%)                                                                   |             |                 |               |           |
| 14                                                                                                                 | 4.9418      | 250.89          | 0.0372        | Singlet-A |
| H-8->LUMO (55%), H-2->L+1 (18%), HOMO->L+1 (11%), H-9->LUMO (-3%), H-7->LUMO (-2%), H-5->L+1 (-2%), H-3->L+1 (-4%) |             |                 |               |           |

|                                                                                                                                                                                      |        |        |        |           |
|--------------------------------------------------------------------------------------------------------------------------------------------------------------------------------------|--------|--------|--------|-----------|
| 15                                                                                                                                                                                   | 5.0874 | 243.71 | 0.0183 | Singlet-A |
| H-9->LUMO (78%) H-4->L+1 (9%), HOMO->L+1 (4%)                                                                                                                                        |        |        |        |           |
| 16                                                                                                                                                                                   | 5.1281 | 241.77 | 0.0173 | Singlet-A |
| H-4->L+1 (69%) H-9->LUMO (-6%), H-6->L+1 (8%), H-2->L+2 (2%)                                                                                                                         |        |        |        |           |
| 17                                                                                                                                                                                   | 5.2472 | 236.29 | 0.0287 | Singlet-A |
| H-6->L+1 (68%) H-9->LUMO (4%), H-4->L+1 (-6%), H-4->L+2 (-6%), H-2->L+2 (2%)                                                                                                         |        |        |        |           |
| 18                                                                                                                                                                                   | 5.5103 | 225.0  | 0.0007 | Singlet-A |
| H-1->L+2 (95%) H-2->L+2 (-2%)                                                                                                                                                        |        |        |        |           |
| 19                                                                                                                                                                                   | 5.7358 | 216.16 | 0.1376 | Singlet-A |
| H-2->L+2 (40%), HOMO->L+2 (12%), HOMO->L+3 (-16%) H-6->L+1 (-4%),<br>H-6->L+3 (3%), H-4->L+2 (-5%), H-4->L+3 (3%), H-2->L+3 (8%)                                                     |        |        |        |           |
| 20                                                                                                                                                                                   | 5.7388 | 216.04 | 0.0015 | Singlet-A |
| H-12->LUMO (80%) H-11->LUMO (8%), H-5->L+2 (-3%), H-1->L+3 (-3%)                                                                                                                     |        |        |        |           |
| 21                                                                                                                                                                                   | 5.7874 | 214.23 | 0.0014 | Singlet-A |
| H-7->L+1 (82%) H-12->LUMO (3%), H-8->L+1 (4%), H-7->L+3 (-2%), H-1->L+3 (5%)                                                                                                         |        |        |        |           |
| 22                                                                                                                                                                                   | 5.8491 | 211.97 | 0.1851 | Singlet-A |
| H-5->L+2 (10%), H-4->L+2 (23%), H-3->L+2 (13%), HOMO->L+2 (16%) H-9->L+1 (-2%), H-8-><br>>L+1 (-5%), H-6->L+1 (4%), H-6->L+2 (-2%), H-6->L+3 (3%), H-1->L+3 (-9%), HOMO->L+3<br>(3%) |        |        |        |           |
| 23                                                                                                                                                                                   | 5.8591 | 211.61 | 0.046  | Singlet-A |
| H-5->L+2 (45%), H-1->L+3 (-26%) H-10->LUMO (5%), H-4->L+2 (-5%), H-3->L+2 (-3%),<br>HOMO->L+2 (-4%)                                                                                  |        |        |        |           |
| 24                                                                                                                                                                                   | 5.8705 | 211.2  | 0.0028 | Singlet-A |
| H-10->LUMO (89%) H-3->L+2 (4%)                                                                                                                                                       |        |        |        |           |
| 25                                                                                                                                                                                   | 5.8956 | 210.3  | 0.0379 | Singlet-A |
| H-4->L+2 (-15%), H-3->L+2 (71%) H-10->LUMO (-3%)                                                                                                                                     |        |        |        |           |
| 26                                                                                                                                                                                   | 5.9172 | 209.53 | 0.0015 | Singlet-A |
| H-5->L+2 (38%), H-1->L+3 (50%) H-12->LUMO (4%), H-7->L+1 (-4%)                                                                                                                       |        |        |        |           |
| 27                                                                                                                                                                                   | 5.9876 | 207.07 | 0.0719 | Singlet-A |
| H-8->L+1 (80%) H-7->L+1 (-3%), HOMO->L+2 (3%), HOMO->L+3 (3%)                                                                                                                        |        |        |        |           |
| 28                                                                                                                                                                                   | 6.0182 | 206.02 | 0.102  | Singlet-A |
| H-2->L+2 (-22%), HOMO->L+2 (35%) H-4->L+2 (-7%), H-4->L+3 (-9%), H-3->L+2 (-4%), H-2-><br>>L+3 (9%)                                                                                  |        |        |        |           |
| 29                                                                                                                                                                                   | 6.0755 | 204.07 | 0.002  | Singlet-A |
| H-14->LUMO (58%), H-11->LUMO (31%) H-12->LUMO (-6%)                                                                                                                                  |        |        |        |           |



30 6.1206 202.57 0.0824 Singlet-A  
H-9->L+1 (61%), HOMO->L+3 (15%) H-11->LUMO (4%), H-6->L+2 (-7%), H-4->L+3 (3%)

### First 30 excited triplet states

*No. Energy (eV) Wavelength (nm) Osc. Strength Symmetry*  
*Major and minor contributions (%)*

1 2.6611 465.92 0.0 Triplet-A  
H-1->LUMO (97%) H-5->L+1 (6%), H-2->LUMO (-2%)

2 2.8898 429.04 0.0 Triplet-A  
H-6->LUMO (-14%), H-4->LUMO (-18%), HOMO->LUMO (55%), H-6->L+2 (4%),  
H-4->L+2 (2%), H-3->LUMO (-3%), H-2->LUMO (-8%), H-2->L+1 (-6%), H-2->L+3 (-4%)

3 2.9379 422.02 0.0 Triplet-A  
H-6->LUMO (52%), HOMO->LUMO (28%), H-9->LUMO (7%), H-8->LUMO (3%),  
H-4->LUMO (7%), H-4->L+1 (8%), H-4->L+3 (-3%), H-2->L+1 (3%), HOMO->L+1 (4%),  
HOMO->L+2 (6%)

4 2.9407 421.61 0.0 Triplet-A  
H-5->LUMO (93%), H-1->L+1 (10%), H-1->L+9 (-2%)

5 3.0455 407.11 0.0 Triplet-A  
H-2->LUMO (82%), HOMO->LUMO (10%), H-6->LUMO (-8%), H-4->LUMO (3%)

6 3.3068 374.94 0.0 Triplet-A  
H-6->LUMO (-18%), H-4->LUMO (69%), H-2->LUMO (-11%) HOMO->LUMO (2%)

7 3.8419 322.72 0.0 Triplet-A  
H-3->LUMO (94%) H-4->LUMO (-3%)

8 3.8863 319.03 0.0 Triplet-A  
H-6->L+1 (-10%), H-4->L+1 (57%), HOMO->L+1 (12%) H-6->LUMO (-7%), H-6->L+3 (2%),  
H-4->L+3 (-9%), H-2->L+3 (-2%), HOMO->LUMO (-5%), HOMO->L+3 (-3%)

9 3.9207 316.23 0.0 Triplet-A  
H-2->L+1 (61%), H-2->L+3 (21%) H-6->LUMO (-8%), H-4->LUMO (-3%), H-4->L+3 (-3%),  
H-2->L+2 (-3%), HOMO->L+1 (8%)

10 4.2931 288.8 0.0 Triplet-A  
H-4->L+1 (-12%), H-2->L+1 (-12%), HOMO->L+1 (69%), H-6->L+3 (-5%), H-3->L+1 (-2%)

11 4.4789 276.82 0.0 Triplet-A  
H-5->LUMO (-10%), H-1->L+1 (85%), H-2->L+1 (-2%)

12 4.5572 272.06 0.0 Triplet-A  
H-6->L+1 (77%), H-4->L+1 (10%) HOMO->L+3 (-7%)

- 13 4.6471 266.8 0.0 Triplet-A  
H-8->LUMO (16%), H-7->LUMO (60%), H-5->L+1 (10%), H-9->LUMO (2%),  
HOMO->L+2 (-3%)
- 14 4.6606 266.03 0.0 Triplet-A  
H-13->LUMO (13%), H-9->LUMO (26%), H-7->LUMO (-17%), HOMO->L+2 (-19%)  
H-8->LUMO (9%), H-6->L+8 (3%), H-4->L+2 (2%), H-2->L+2 (4%)
- 15 4.8168 257.4 0.0 Triplet-A  
H-7->LUMO (-17%), H-5->L+1 (72%), H-1->LUMO (-3%)
- 16 4.8388 256.23 0.0 Triplet-A  
H-8->LUMO (33%), HOMO->L+2 (27%), H-13->LUMO (-3%), H-9->LUMO (9%),  
H-6->LUMO (-4%), H-5->L+1 (-6%), H-4->L+2 (-2%), H-2->L+1 (-2%), H-2->L+2 (-4%)
- 17 4.8887 253.61 0.0 Triplet-A  
H-3->L+1 (92%) H-4->L+1 (-3%)
- 18 4.9681 249.56 0.0 Triplet-A  
H-9->LUMO (52%), H-8->LUMO (-36%) H-7->LUMO (3%), HOMO->L+2 (3%)
- 19 5.1746 239.6 0.0 Triplet-A  
H-18->LUMO (10%), H-4->L+2 (-19%), H-2->L+2 (41%), H-13->L+1 (4%), H-6->L+2 (6%),  
H-6->L+9 (-2%), H-4->L+3 (-4%), H-2->L+8 (6%), HOMO->L+3 (7%)
- 20 5.2801 234.81 0.0 Triplet-A  
H-4->L+2 (36%), H-2->L+2 (25%), HOMO->L+2 (21%) H-18->LUMO (-3%), H-2->L+1 (3%)
- 21 5.3637 231.15 0.0 Triplet-A  
H-6->L+2 (58%), H-13->LUMO (-2%), H-6->L+3 (3%), H-4->L+1 (-3%), H-4->L+2 (2%), H-4->  
L+8 (2%), H-2->L+1 (3%), H-2->L+2 (-6%), H-2->L+3 (-7%), HOMO->L+2 (-2%), HOMO->  
L+8 (-4%)
- 22 5.3842 230.28 0.0 Triplet-A  
H-1->L+2 (93%), H-2->L+2 (-3%)
- 23 5.545 223.6 0.0 Triplet-A  
H-4->L+2 (19%), H-4->L+3 (-10%), H-2->L+3 (24%), HOMO->L+3 (20%), H-6->L+2 (3%), H-2->  
L+1 (-9%), HOMO->L+1 (-2%)
- 24 5.5701 222.59 0.0 Triplet-A  
H-12->LUMO (76%), H-5->L+2 (-11%), H-11->LUMO (7%)
- 25 5.5996 221.41 0.0 Triplet-A  
H-13->LUMO (57%), HOMO->L+2 (10%) H-22->LUMO (2%), H-18->L+1 (2%), H-9->LUMO (-  
3%), H-6->L+2 (9%), H-4->L+2 (-3%), H-2->L+3 (4%)
- 26 5.6487 219.49 0.0 Triplet-A  
H-7->L+1 (72%), H-1->L+3 (10%) H-8->L+1 (8%), H-7->L+3 (-3%)

27 5.663 218.94 0.0 Triplet-A  
H-2->L+3 (33%), HOMO->L+3 (-24%) H-18->LUMO (-5%), H-13->LUMO (-6%), H-7->L+1 (-2%), H-6->L+2 (2%), H-4->L+2 (-4%), H-2->L+1 (-2%), H-2->L+2 (7%), HOMO->L+2 (-3%)

28 5.7387 216.05 0.0 Triplet-A  
H-5->L+2 (-41%), H-1->L+3 (42%) H-12->LUMO (-6%), H-7->L+1 (-6%)

29 5.7787 214.55 0.0 Triplet-A  
H-9->L+1 (20%), H-8->L+1 (23%), HOMO->L+3 (-11%) H-18->LUMO (6%), H-10->LUMO (-4%), H-6->L+2 (-5%), H-4->L+1 (-7%), H-4->L+2 (3%), H-4->L+3 (-6%)

30 5.8417 212.24 0.0 Triplet-A  
H-3->L+2 (90%), H-4->L+2 (-4%)

Note that all the transitions  $S_0 \rightarrow T_1$  show a null oscillator strength, because they are forbidden by the symmetry rules.

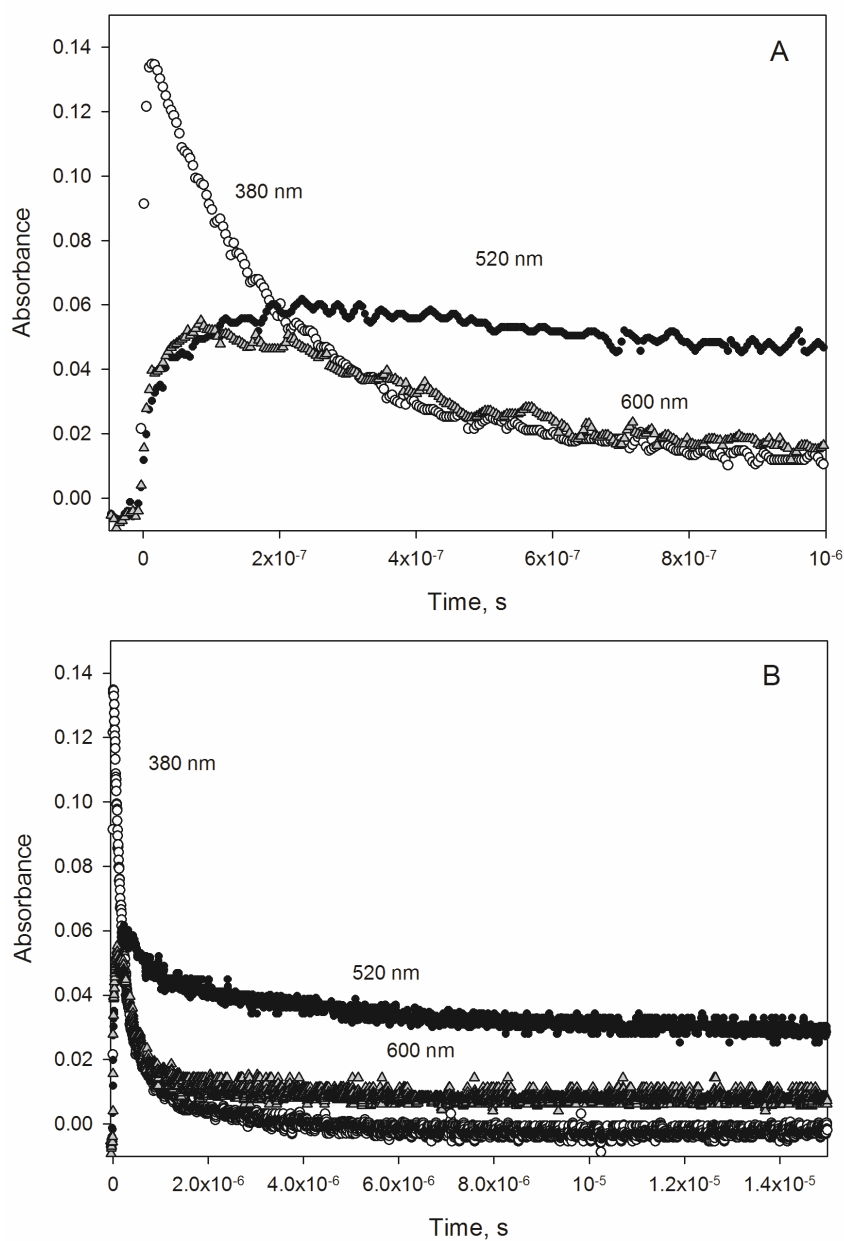

**Figure ESI-3.** Absorbance traces of transient species formed after the laser pulse (355 nm, 45 mJ), in the presence of 0.1 mM AQ2S at pH 6.5. Monitored transient species were: AQ2S triplet state (380 nm), B (520 nm) and C (600 nm). Time scale after laser pulse: 1  $\mu$ s (A) and 15  $\mu$ s (B).

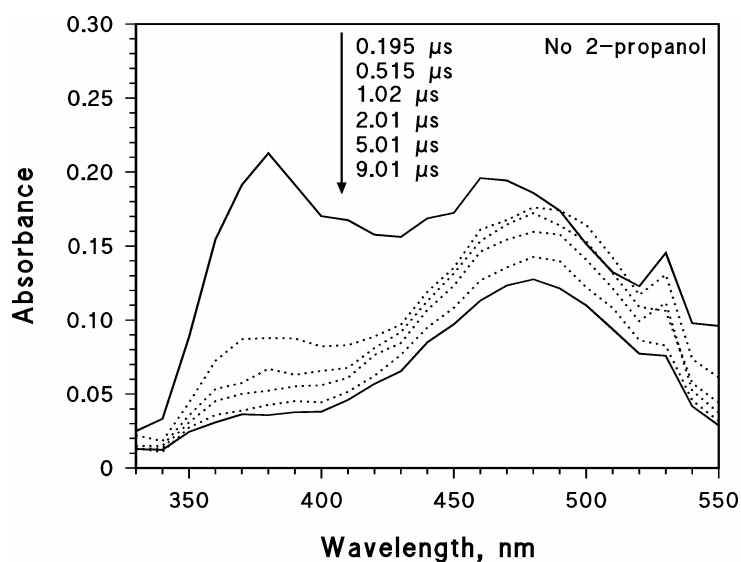

**Figure ESI-4.** Time trend of the absorption spectra of the transient species formed by laser pulse irradiation (355 nm, 45 mJ) of 0.1 mM AQ2S. The experiments were carried out in aerated solution, at  $295 \pm 2$  K and pH 6.5.

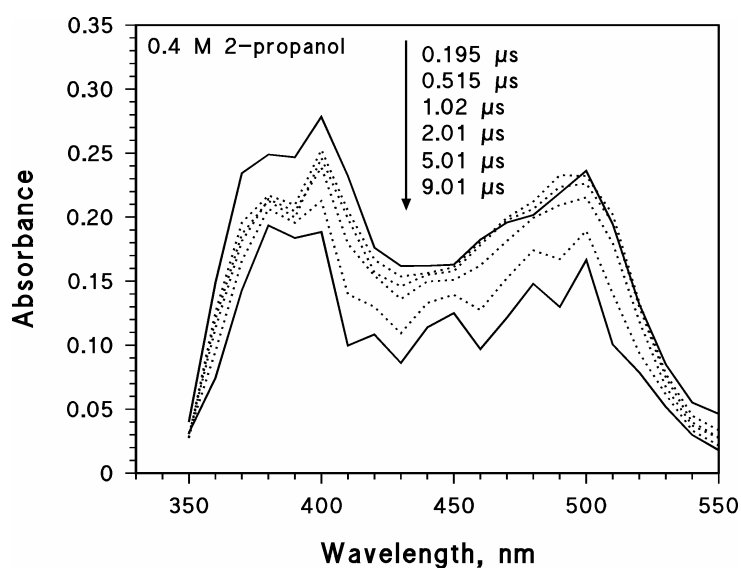

**Figure ESI-5.** Time trend of the absorption spectra of the transient species formed by laser pulse irradiation (355 nm, 45 mJ) of 0.1 mM AQ2S and 0.4 M 2-propanol. The experiments were carried out in aerated solution, at  $295 \pm 2$  K and pH 6.5.

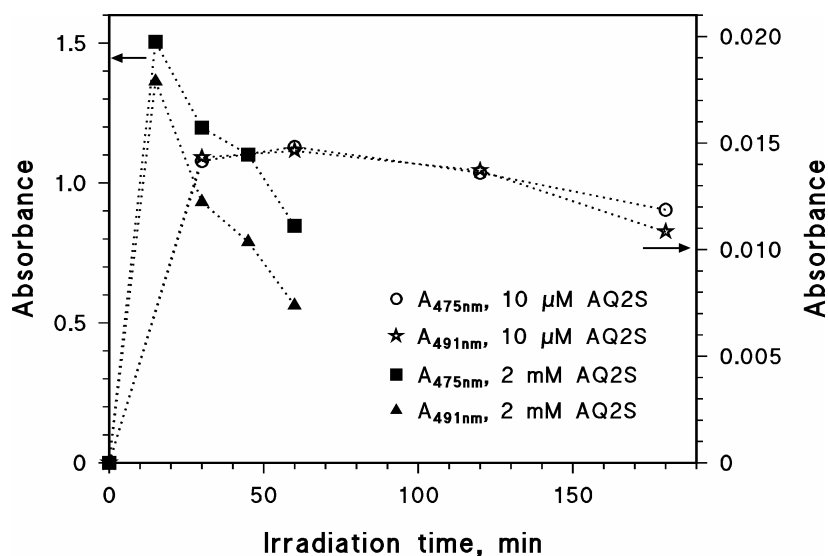

**Figure ESI-6.** Time trend of the absorbance (measured over an optical path length  $b = 1$  cm) upon irradiation of AQ2S solutions, adjusted to pH 12 with NaOH after irradiation. Left Y-axis: absorbance with 2 mM initial AQ2S. Right Y-axis: absorbance with 0.10 μM initial AQ2S. The experiments were carried out in aerated solution at  $295 \pm 2$  K. UVA irradiation took place under the Philips TLK 05 lamp.
